# Supplementary material
Source: PubMed Central journal article supplement (PMC4974067)
Supplement: mmc1.pdf [file mmc1.pdf]

**The American Journal of Human Genetics, Volume 99**

**Supplemental Data**

**De Novo Mutations in *SLC1A2* and *CACNA1A*  
Are Important Causes of Epileptic Encephalopathies**

**Epi4K Consortium**

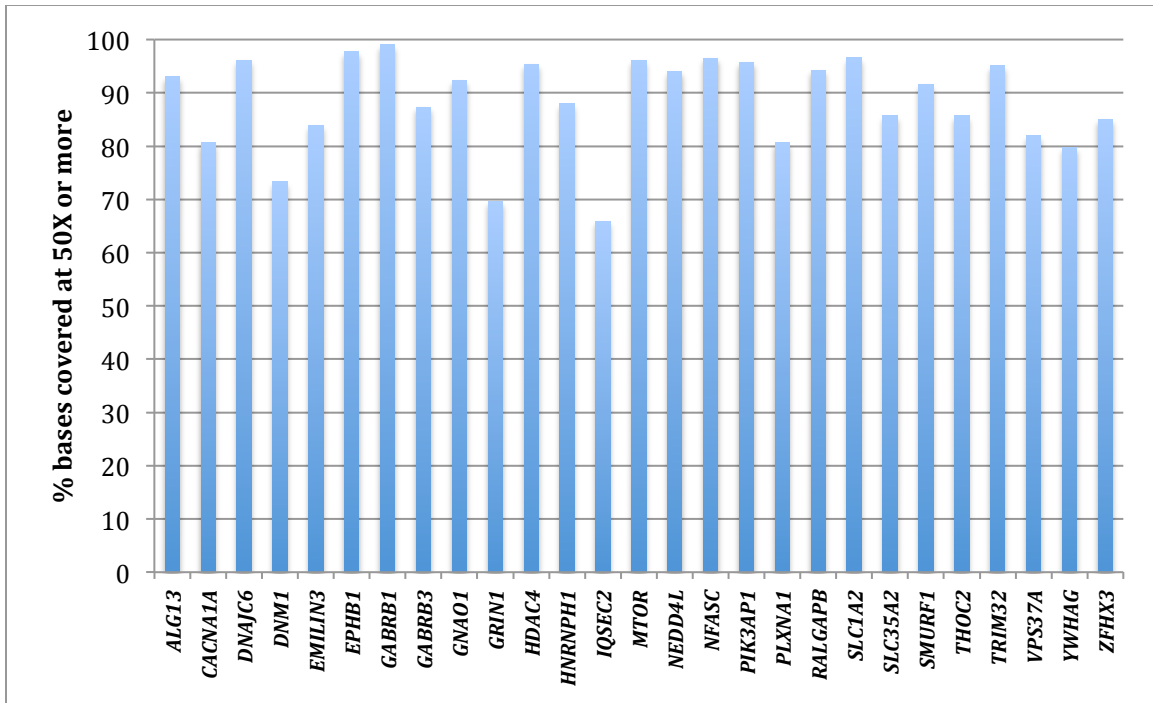

Figure S1. The average percent of the target covered at 50X or greater by gene. All coding exons plus a minimum 5 base pair intronic flank were captured and sequenced. The percent of the target covered at  $\geq 50X$  averaged across all samples is shown. GATK was used to generate the depth of coverage statistics.

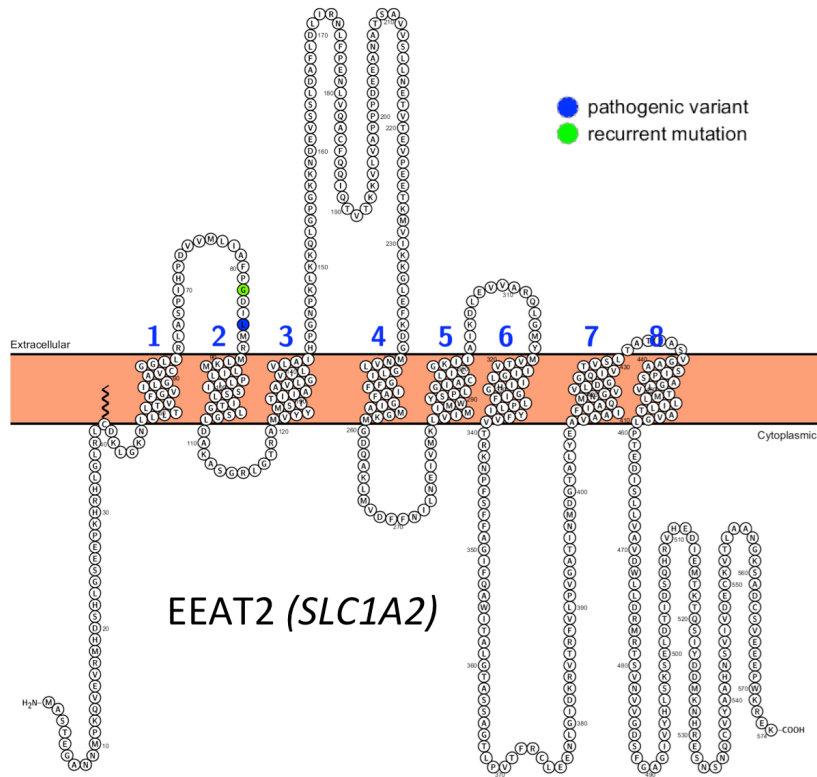

Figure S2. Schematic representation of the Excitatory Amino Acid Transporter 2 (EEAT2) encoded by *SLC1A2*. The pathogenic variant (blue; p.Leu85) and recurrent mutation (green; p.Gly82) are highlighted.

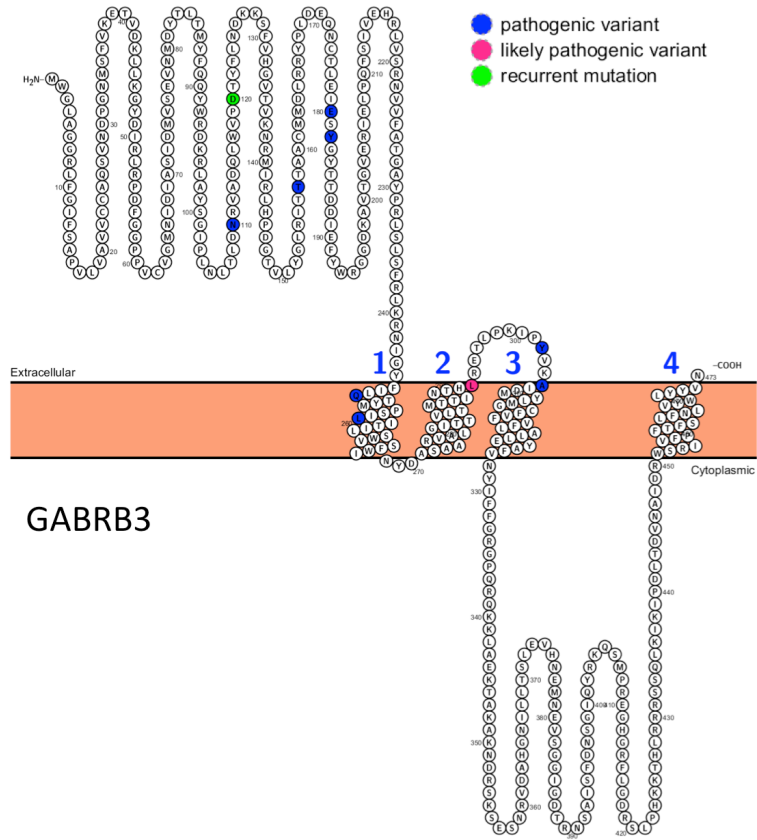

Figure S3. Schematic representation of gamma-aminobutyric acid receptor subunit beta-3 encoded by *GABRB3*. The pathogenic variants (blue; p.Asn110, p.Thr157, p.Glu180, p.Tyr182, p.Gln249, p.Leu256, p.Tyr302, p.Ala305), likely pathogenic variant (pink; p.Leu293), and recurrent mutation (green; p.Asp120) are highlighted.

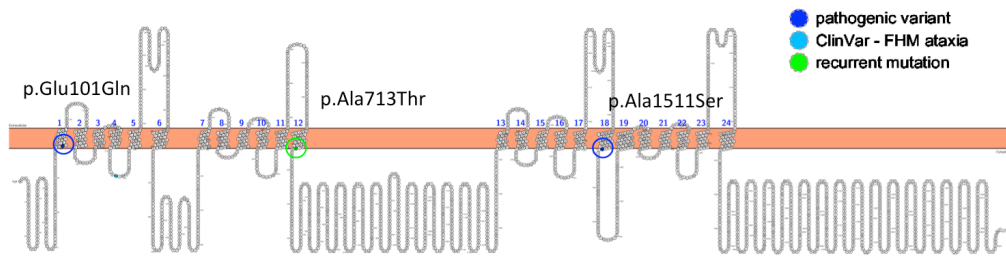

### Cav2.1 (*CACNA1A*)

Figure S4. Schematic representation of voltage-dependent P/Q-type calcium channel subunit alpha-1A encoded by *CACNA1A*. The pathogenic variants (blue; p.Glu101, p.Ala1511) and the recurrent mutation (green; p.Ala713) are highlighted.

**Table S1. Variants of interest but unknown significance (VOUS)**

| <b>Gene</b>           | <b>Proband</b> | <b>Inheritance</b>            | <b>Inferred Effect</b> | <b>GRCh37/hg19 Genomic Coordinate</b> | <b>cDNA Change</b>           | <b>Protein Change</b> | <b>CADD</b> | <b>Diagnosis</b> |
|-----------------------|----------------|-------------------------------|------------------------|---------------------------------------|------------------------------|-----------------------|-------------|------------------|
| <b><i>GABRB1</i></b>  | T23947         | Unknown                       | VOUS                   | chr4:g.47408909                       | NM_000812.3:c.1046A>G        | p.Asn349Ser           | 7.46        | EE               |
| <b><i>PLXNA1</i></b>  | T3902          | Unknown, father unavailable   | VOUS                   | chr3:g.126708005                      | NM_032242.3:c.569C>G         | p.Pro190Arg           | 20.40       | MAE              |
| <b><i>DNAJC6</i></b>  | T20772         | Unknown, father not available | VOUS                   | chr1:g.65852559                       | NM_001256864.1:c.1060G>A     | p.Val354Ile           | 12.11       | FIRES            |
| <b><i>SLC1A2</i></b>  | T23130         | Unknown, mom unavailable      | VOUS                   | chr11:g.35302454                      | NM_004171.3:c.1381A>G        | p.Thr461Ala           | 17.72       | EE               |
| <b><i>ZFH3</i></b>    | T22799         | Unknown                       | VOUS                   | chr16:g.72821807_72821809del          | NM_006885.3:c.10366_10368del | p.Phe3456del          | NA          | EE, malformation |
| <b><i>CACNA1A</i></b> | T25363         | Unknown, father unavailable   | VOUS                   | chr19:g.13368241                      | NM_023035.2:c.4525T>C        | p. Phe1509Leu         | 19.7        | EE               |

All variants are novel in ExAC (v0.3) and the parents where tested when available. EE, epileptic encephalopathy; MAE, epilepsy with myoclonic-atonic seizures; FIRES, febrile infection related epilepsy syndrome.

**Table S2. Clinical features of individuals with mutations in *ALG13*, *IQSEC2*, *DNM1* and *GNAO1***

| Identifier                 | Age Sex | Epilepsy syndrome | Gene   | Development prior to seizure onset                              | Age of seizure onset                | Seizure type at onset                                                                                                                                                                                                                                      | Development after seizure onset       | Other seizure types                                                                   | Age of seizure offset | EEG                                                                                                                                                                                  | Neuroimaging                                                                                                                    | Other features                                                                                                                                                                                                                                  | Medications                                                     |
|----------------------------|---------|-------------------|--------|-----------------------------------------------------------------|-------------------------------------|------------------------------------------------------------------------------------------------------------------------------------------------------------------------------------------------------------------------------------------------------------|---------------------------------------|---------------------------------------------------------------------------------------|-----------------------|--------------------------------------------------------------------------------------------------------------------------------------------------------------------------------------|---------------------------------------------------------------------------------------------------------------------------------|-------------------------------------------------------------------------------------------------------------------------------------------------------------------------------------------------------------------------------------------------|-----------------------------------------------------------------|
| T22647                     | 6y F    | EOEE              | ALG13  | Delayed                                                         | 1-2mth                              | Tonic                                                                                                                                                                                                                                                      | Profound ID                           | Spasms<br>Myoclonic                                                                   | Ongoing               | Hypsarrhythmia<br>PFA<br>Biposterior sharp slow activity                                                                                                                             | Plagiocephaly<br>Increased signal and probable diffusion restriction in dorsal pontomedullary white matter tracts (?due to VGB) | Hypotonia<br>Choreoathetoid movements;<br>horizontal head movement<br>Esotropia variable<br>Cortical visual impairment<br>Sleep problems                                                                                                        | CZP, ZNS, Melatonin, Prednisolone, VGB, TPM, LEV                |
| T17563                     | 48y F   | SGE               | IQSEC2 | Delayed                                                         | 5y                                  | Absence                                                                                                                                                                                                                                                    | Mild ID<br>Regression at 5y with NCSE | Tonic-clonic<br>Myoclonic<br>Drop attacks                                             | 38y                   | Sharp slow activity maximal in temporal regions<br>Mild background slowing                                                                                                           | Normal                                                                                                                          | Breathholding attacks<br>Endometriosis<br>Mild obesity                                                                                                                                                                                          | PRM, CBZ, PB, PHT, NZP, DZP, VPA, CZP, CBZ                      |
| T24107 (sister of T26298)  | 4y F    | EE                | DNM1   | Delayed                                                         | Unclear                             | Tonic                                                                                                                                                                                                                                                      | Profound ID                           | Myoclonic                                                                             | Ongoing               | Bilateral occipital epileptiform activity<br>Diffuse background slowing<br>Multifocal epileptiform discharges                                                                        | Prominent CSF spaces and ventricles with dysmyelination                                                                         | Dyskinesia, stereotypies exacerbated by fever, horizontal head shaking<br>Sandifer syndrome (GORD)<br>Cortical visual impairment<br>Sleep problems<br>Alternating strabismus<br>Hypotonia                                                       | GBP, PB, LEV, steroids, nil                                     |
| T26298 (brother of T24107) | 23m M   | EE                | DNM1   | Delayed                                                         | 4mth                                | Epileptic spasms                                                                                                                                                                                                                                           | Severe delay<br>Regression            | Focal clonic<br>Tonic-clonic<br>Myoclonic<br>Focal impaired awareness                 | Ongoing               | Bitemporal epileptiform activity                                                                                                                                                     | Normal                                                                                                                          | Movement disorder: forced blinking at 3 mths, complex motor behaviours, side to side rocking, facial grimace, non-integrated hyperkinetic movements of trunk and limbs<br>Cortical visual impairment<br>Generalised hypotonia<br>Sleep disorder | CLB, prednisolone, LEV                                          |
| T25023                     | 26m M   | EOEE              | GNAO1  | Increased foetal movements with feelings of "flipping" from 32w | 26 minutes (clinical seizure at 9d) | Apnoeic seizures (recurrent apnoeas without respiratory aetiology)<br><br>Focal clonic movements of tongue and jaw, colour change, abnormal eye movements and back arching<br><br>9d: clonic activity of L eye and side of mouth, drooling and grey colour | Delayed<br>Regression                 | IS<br>Focal<br>Jerky movements with eye deviation<br>Asymmetric tonic<br>Tonic-clonic | Ongoing               | Multifocal<br>Modified Hypsarrhythmia<br>Burst suppression in sleep<br>High voltage midline central discharges during spasms<br>Generalised decrement with low voltage fast activity | Moderate-severe progressive global atrophy with delayed myelination<br>Thin CC                                                  | Strabismus (requiring surgery)<br>Autonomic dysfunction (excessive sweating with seizures)<br>Central hypotonia<br>Choreoathetosis                                                                                                              | VPA, KD, pyridoxal-5-phosphate, VGB, TPM, LEV, PB, prednisolone |

ACTH, adrenocorticotrophic hormone; ADHD, attention deficit hyperactivity disorder; AZD, acetazolamide; CBZ, carbamazepine; CC, corpus callosum; CLB, clobazam; CLZ, clorazepate; C-PAP, continuous positive airway pressure; CSF, cerebral spinal fluid; CT, computed tomography; CSE, convulsive status epilepticus; CZP, clonazepam; d, days; DZP, diazepam; EE, epileptic encephalopathy; EIEE, early infantile epileptic encephalopathy; EIMFS, epilepsy of infancy with migrating focal seizures; EME, early myoclonic encephalopathy; EOEE, early onset epileptic encephalopathy; ETX, ethosuxamide; F, female; FBM, felbamate; FIAS, focal impaired awareness seizure; FS, febrile seizures; GBP, gabapentin; GORD, gastro-oesophageal reflux disease; GPFA, generalised paroxysmal fast activity; GSW, generalised spike wave; h, hours; ID, intellectual disability; IS, infantile spasms; KD, ketogenic diet; kg, kilograms; L, left; LCM, lacosamide; LEV, levetiracetam; LTG, lamotrigine; LGS, Lennox-Gastaut Syndrome; M, male; MAD, modified Atkins diet; MDZ, midazolam; mth, months; NCSE, non-convulsive status

epilepticus; NG, nasogastric; NICU, neonatal intensive care unit; NZP, nitrazepam; OCBZ, oxcarbazepine; PB, phenobarbitone; PFA, paroxysmal fast activity; PHT, phenytoin; PRM, primidone; PSW, polyspike wave; PEG, percutaneous endoscopic gastrostomy; R, right; RFM, rufinamide; sec, seconds; SE, status epilepticus; SGE, symptomatic generalised epilepsy; SPECT, single-photon emission computed tomography; STP, stiripentol; SSW, slow spike wave; TPM, topiramate; VGB, vigabatrin; VNS, vagus nerve stimulation; VPA, valproate; w, weeks; y, years; ZNS, zonisamide  
\*medications current at last follow-up underlined



## Epi4K Consortium Members

Candace T. Myers<sup>1</sup>, Jacinta M. McMahon<sup>2</sup>, Amy L. Schneider<sup>2</sup>, Slavé Petrovski<sup>2,3,4</sup>, Andrew S. Allen<sup>5</sup>, Gemma L. Carvill<sup>1</sup>, Matthew Zemel<sup>1</sup>, Julia E. Saykally<sup>1</sup>, Amy J. LaCroix<sup>1</sup>, Erin L. Heinzen<sup>3</sup>, Georgina Hollingsworth<sup>2</sup>, Marina Nikanorova<sup>6</sup>, Mark Corbett<sup>7</sup>, Jozef Gecz<sup>8</sup>, David Coman<sup>9</sup>, Jeremy L. Freeman<sup>10</sup>, Sophie Calvert<sup>11</sup>, Deepak Gill<sup>12</sup>, Patrick Carney<sup>13</sup>, Tally Lerman-Sagie<sup>14</sup>, Hugo Sampaio<sup>15</sup>, Patrick Cossette<sup>16</sup>, Norman Delanty<sup>17</sup>, Dennis Dlugos<sup>18</sup>, Evan E. Eichler<sup>19</sup>, Michael P. Epstein<sup>20</sup>, Tracy Glauser<sup>21</sup>, Michael R. Johnson<sup>22</sup>, Ruben Kuzniecky<sup>23</sup>, Anthony G. Marson<sup>24</sup>, Terence J. O'Brien<sup>4</sup>, Ruth Ottman<sup>25</sup>, Steven Petrou<sup>26</sup>, Annapurna Poduri<sup>27</sup>, William O. Pickrell<sup>28</sup>, Seo-Kyung Chung<sup>28</sup>, Mark I. Rees<sup>28</sup>, Elliott Sherr<sup>29</sup>, Lynette G. Sadleir<sup>30</sup>, David B. Goldstein<sup>3</sup>, Daniel H. Lowenstein<sup>31</sup>, Rikke S. Møller<sup>6</sup>, Samuel F. Berkovic<sup>2</sup>, Ingrid E. Scheffer<sup>2,26,32</sup>, Heather C. Mefford<sup>1</sup>

## Affiliations

<sup>1</sup> Department of Pediatrics, Division of Genetic Medicine, University of Washington, Seattle, WA

<sup>2</sup> Epilepsy Research Centre, Department of Medicine, Austin Health, The University of Melbourne, Heidelberg, Victoria, 3084, Australia.

<sup>3</sup> Institute for Genomic Medicine, Columbia University, New York, New York 10032, USA

<sup>4</sup> Department of Medicine, Royal Melbourne Hospital, The University of Melbourne, Melbourne, Victoria, 3050, Australia

<sup>5</sup> Department of Biostatistics and Bioinformatics, Duke Clinical Research Institute, and Center for Human Genome Variation, Duke University Medical Center, Durham, North Carolina 27710 USA

<sup>6</sup> Danish Epilepsy Center, Dianalund, Denmark

<sup>7</sup> School of Medicine, and the Robinson Research Institute, the University of Adelaide, Adelaide, SA 5000, Australia

<sup>8</sup> School of Medicine, and the Robinson Research Institute, the University of Adelaide, Adelaide, SA 5000, Australia

<sup>9</sup> Neurosciences Department, The Lady Cilento Children's Hospital, Brisbane, School of Medicine, The University of Queensland, Brisbane, School of Medicine, Griffith University, Gold Coast

<sup>10</sup> Murdoch Childrens Research Institute, University of Melbourne, Australia

<sup>11</sup> Children's Health Queensland Hospital and Health Service

<sup>12</sup> TY Nelson Department of Neurology, The Children's Hospital at Westmead, Sydney, Australia

<sup>13</sup> The Florey Institute of Neuroscience and Mental Health, Austin Campus, Heidelberg, Victoria, Australia, Austin Health, Heidelberg, Victoria, Australia

<sup>14</sup> Pediatric Neurology Unit, Wolfson Medical Center, Holon, and Sackler School of Medicine, Tel-Aviv University, Tel-Aviv, Israel

<sup>15</sup> Department of Paediatric Neurology, Sydney Children's Hospital, Sydney, Australia

<sup>16</sup> Centre of Excellence in Neuromics and CHUM Research Center, Université de Montréal, CHUM-Hôpital Notre-Dam Montréal, Quebec H2L 4M1e, Canada

<sup>17</sup> Department of Neurology, Beaumont Hospital and Royal College of Surgeons, Dublin 9 Ireland

<sup>18</sup> Departments of Neurology and Pediatrics, The Children's Hospital of Philadelphia, Perelman School of Medicine at the University of Pennsylvania

<sup>19</sup> Department of Genome Sciences, University of Washington School of Medicine, Seattle, WA 98195, USA & Howard Hughes Medical Institute, Seattle, WA 98195, USA

<sup>20</sup> Department of Human Genetics, Emory University School of Medicine, Atlanta, Georgia 30322, USA.

<sup>21</sup> Division of Neurology, Cincinnati Children's Hospital Medical Center, Cincinnati, Ohio 45229 USA

<sup>22</sup> Centre for Clinical Translation Division of Brain Sciences, Imperial College London, London, SW7 2AZ United Kingdom.

<sup>23</sup> NYU Epilepsy Center, Department of Neurology, New York University

<sup>24</sup> Department of Molecular and Clinical Pharmacology, University of Liverpool, Clinical Sciences Centre, Lower Lane, Liverpool, L9 7LJ, United Kingdom.

<sup>25</sup> Departments of Epidemiology and Neurology, and the G.H. Sergievsky Center, Columbia University; and Division of Epidemiology, New York State Psychiatric Institute, New York, New York 10032 USA.

<sup>26</sup> Florey Institute of Neuroscience and Mental Health, The University of Melbourne, VIC 3010, Australia.

<sup>27</sup> Division of Epilepsy and Clinical Neurophysiology, Department of Neurology Boston Children's Hospital, Boston, Massachusetts 02115 USA.

<sup>28</sup> Neurology and Molecular Neuroscience Research, Institute of Life Science, Swansea University Medical School, Swansea University SA2 8PP, United Kingdom

<sup>29</sup> Departments of Neurology, Pediatrics and Institute of Human Genetics, University of California, San Francisco, San Francisco, California 94158 USA.

<sup>30</sup> Department of Paediatrics and Child Health, University of Otago, Wellington, New Zealand

<sup>31</sup> Department of Neurology, University of California, San Francisco, San Francisco, California 94143 USA

<sup>32</sup> Department of Paediatrics, Royal Children's Hospital, The University of Melbourne, Parkville, Victoria, 3050, Australia
